# Supplementary material for: A subtle interplay of C–H hydrogen bonds in complexation of anions of varied dimensionality by a nitro functionalized tripodal podand
Source: Royal Society of Chemistry journal article supplement (doi:10.1039/c0ce00316f), 2010-09-07
Supplement: c0ce00316f.pdf [file c0ce00316f.pdf]

Supplementary Information for:

A subtle interplay of C-H hydrogen bonds in complexation of  
anions of varied dimensionality by a nitro functionalized  
tripodal podand

*Sandeep Kumar Dey, Bimlesh Ojha and Gopal Das\**

*Department of Chemistry, Indian Institute of Technology Guwahati, Assam-781039, India.*

E-mail: [gdas@iitg.ernet.in](mailto:gdas@iitg.ernet.in)

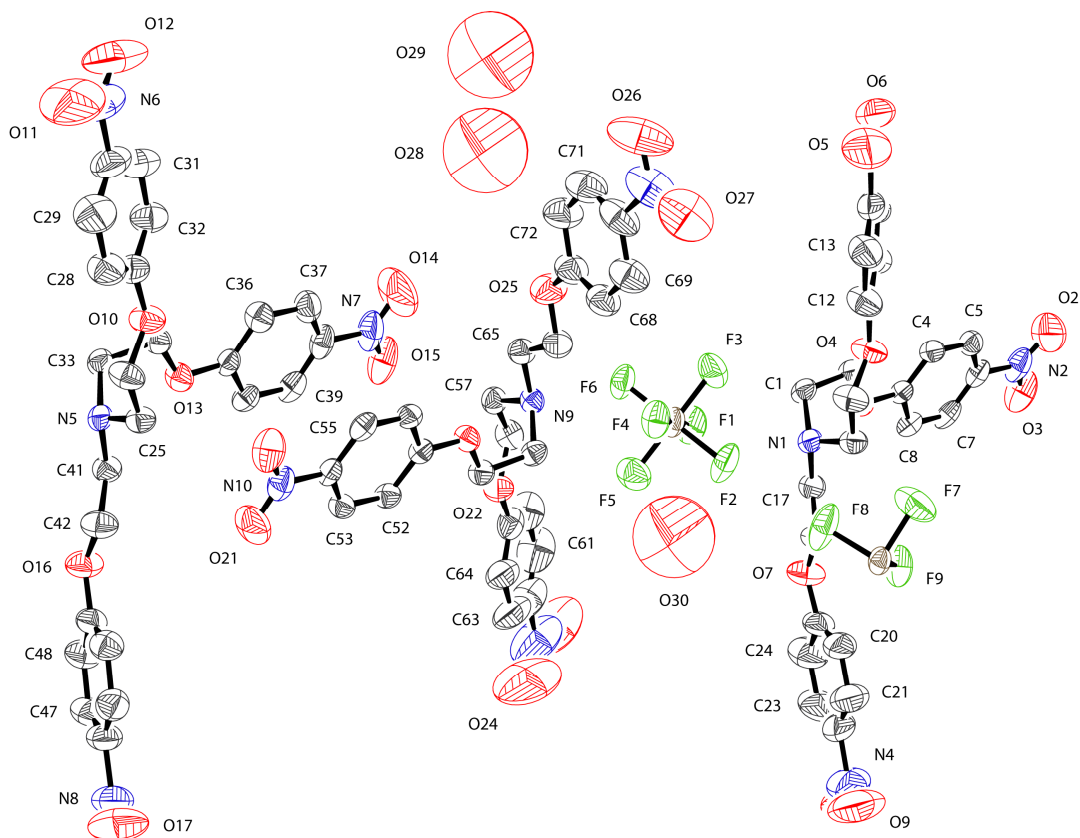

**Figure S1.** ORTEP plot (50 % probability ellipsoids) of [HL<sup>+</sup>][SiF<sub>6</sub>]<sup>-</sup>·1.3 H<sub>2</sub>O (6) along with atom numbering scheme.

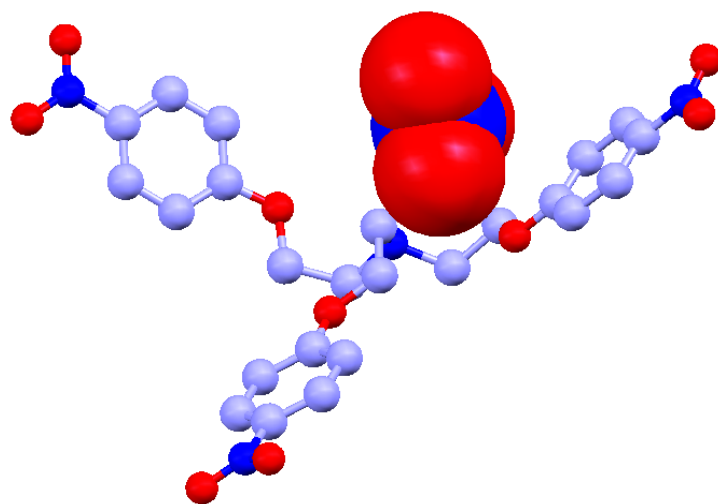

**Figure S2.** Crystal structure of [HL<sup>+</sup>][NO<sub>3</sub>]<sup>-</sup> (3) depicting the tripodal cleft shaped cavity in HL<sup>+</sup> unit with the nitrate being placed within the tripodal cleft.

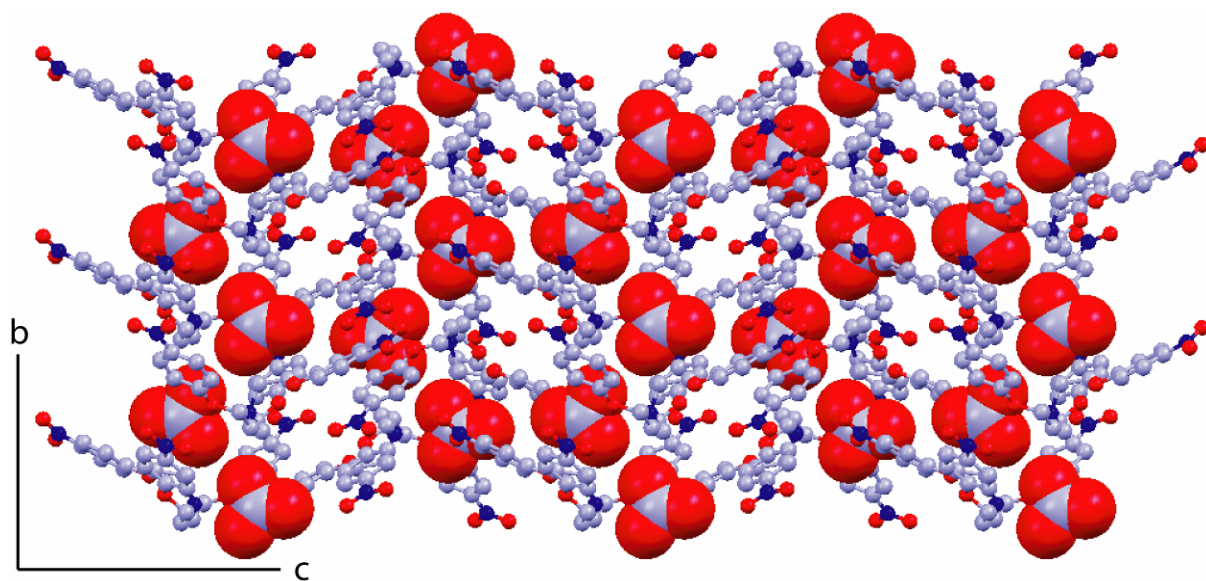

**Figure S3.** Crystal packing diagram of [HL<sup>+</sup>]<sup>+</sup>•[NO<sub>3</sub><sup>-</sup>] (3) as viewed down the crystallographic *a*-axis showing the zigzag arrangement of the nitrate anions along *b*-axis.

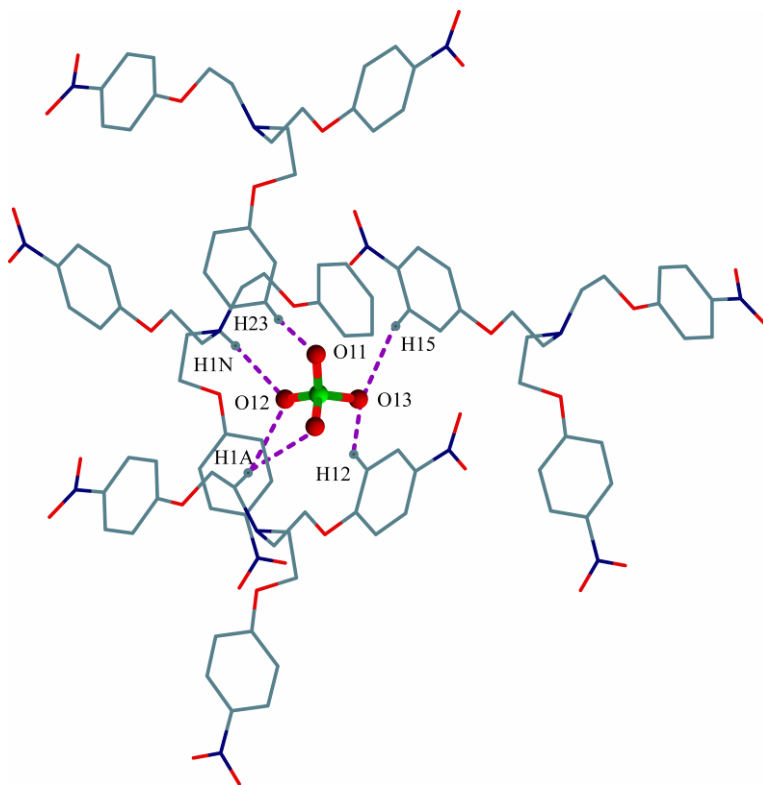

**Figure S4.** Close-up view of perchlorate binding by four encircling HL<sup>+</sup> tripodal receptor molecules in complex [HL<sup>+</sup>]<sup>+</sup>•[ClO<sub>4</sub><sup>-</sup>] (4).

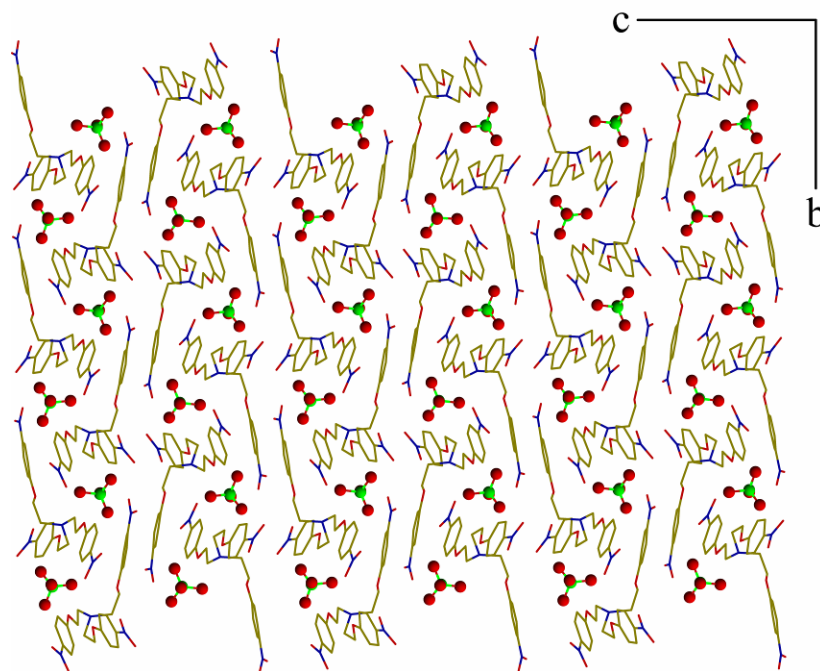

**Figure S5.** Crystal packing diagram of [HL<sup>+</sup>]<sup>+</sup>•[ClO<sub>4</sub><sup>-</sup>] (4) as viewed down the crystallographic *a*-axis showing the zigzag arrangement of the perchlorate anions along *b*-axis.

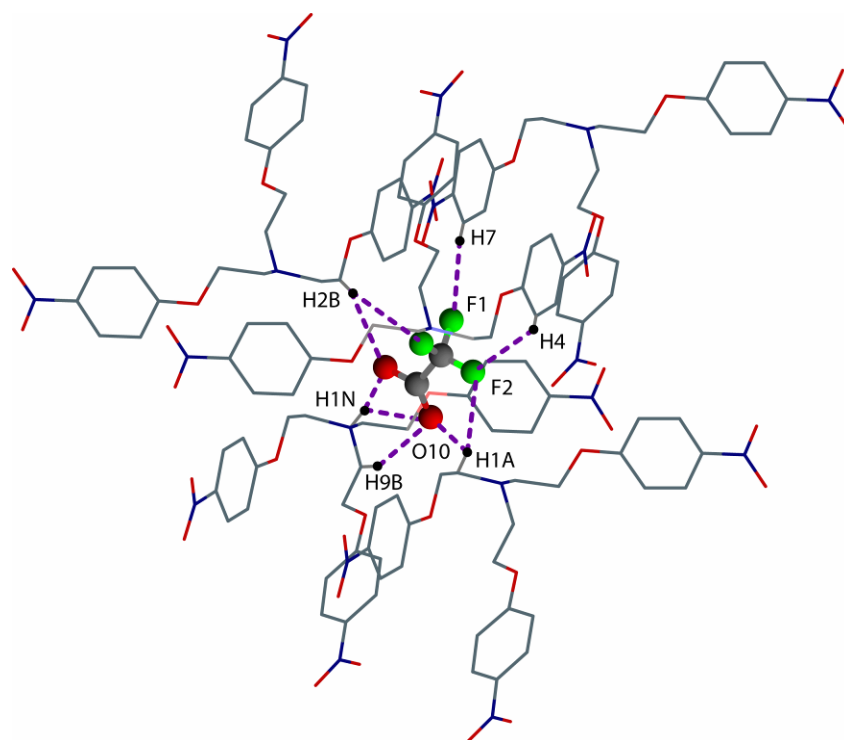

**Figure S6.** Close-up view for binding of trifluoroacetate by five encircling cationic HL<sup>+</sup> tripodal receptor molecules in complex [HL<sup>+</sup>]<sup>+</sup>•[CF<sub>3</sub>COO<sup>-</sup>] (5).

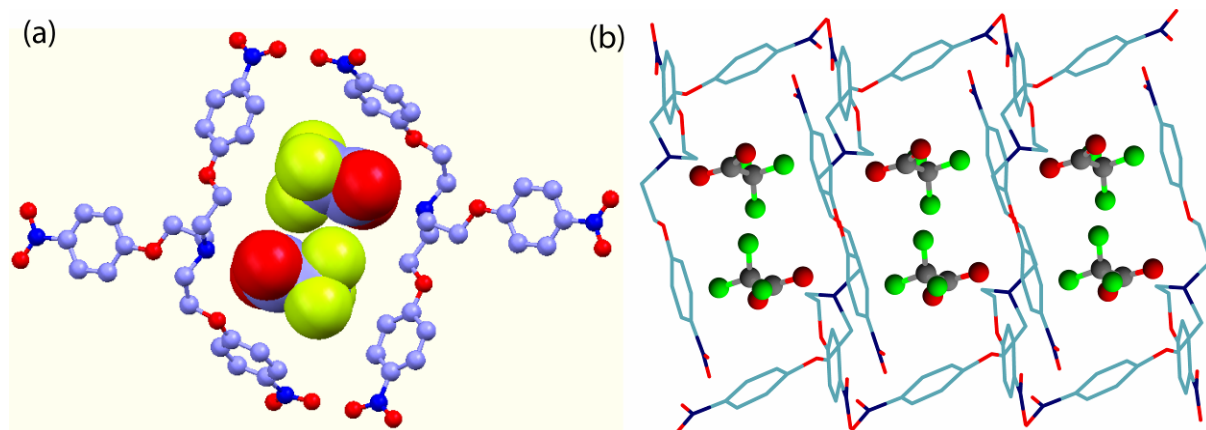

**Figure S7.** Close-up views for the encapsulation of dimeric trifluoroacetate anions within the tripodal cleft of HL<sup>+</sup> units in [HL<sup>+</sup>]<sup>+</sup>[CF<sub>3</sub>COO<sup>-</sup>] (**5**) (Ball and stick representation).

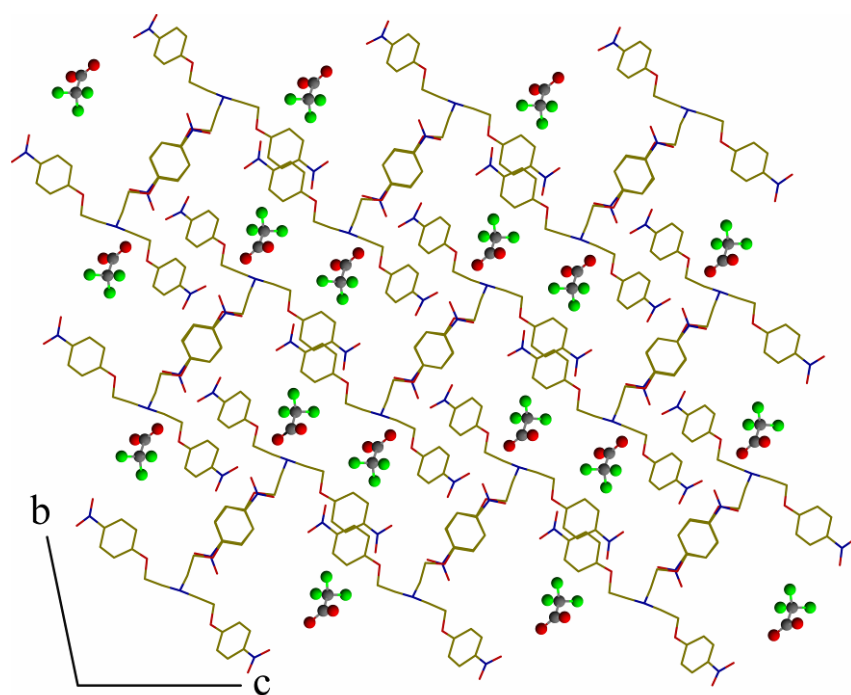

**Figure S8.** Crystal packing diagram of [HL<sup>+</sup>]<sup>+</sup>[CF<sub>3</sub>COO<sup>-</sup>] (**5**) as viewed down the crystallographic *a*-axis.

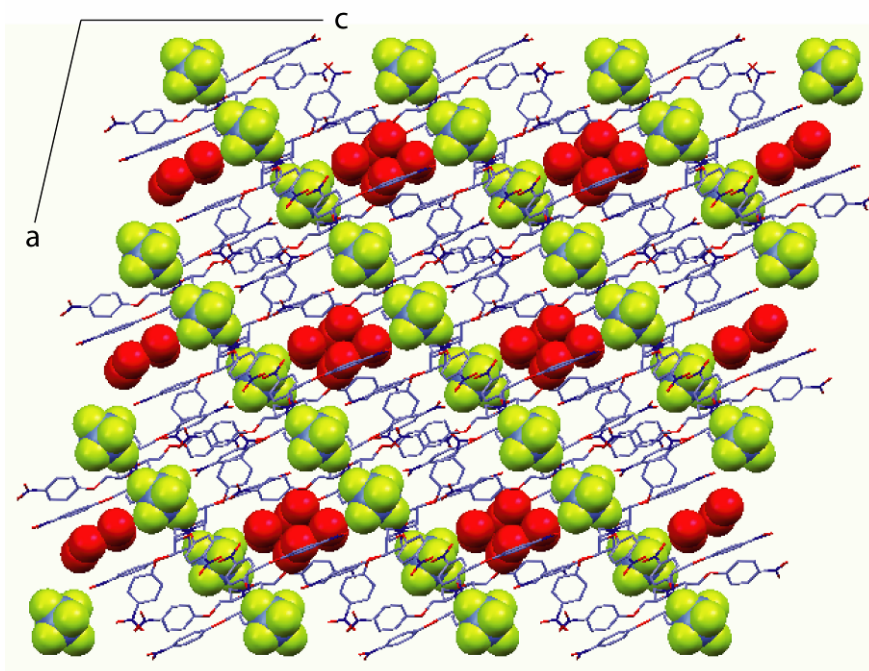

**Figure S9.** Crystal packing diagram of  $[2\text{HL}^+]\cdot[\text{SiF}_6^{-2}]\cdot 2\text{H}_2\text{O}$  (**6**) as viewed down the crystallographic *b*-axis showing the linear arrangement of  $\text{SiF}_6^-$  ions diagonally along the *ac*-plane and cluster of water molecules are positioned in the available space between the adjacent tripodal arrays.

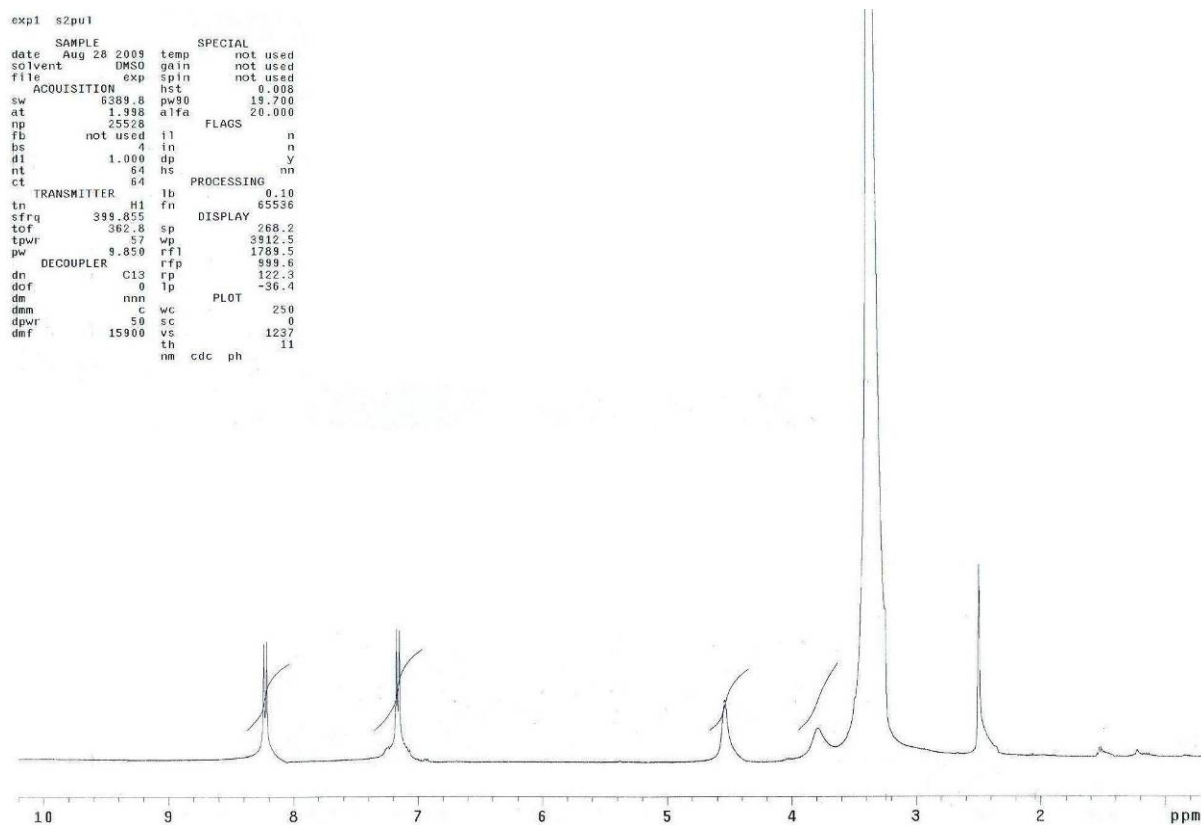

**Figure S10.**  $^1\text{H}$ -NMR spectrum (400 MHz,  $\text{DMSO}-d_6$ ) of  $[\text{HL}^+]\cdot[\text{Cl}^-]$  (**1**) in  $\text{DMSO}-d_6$ .

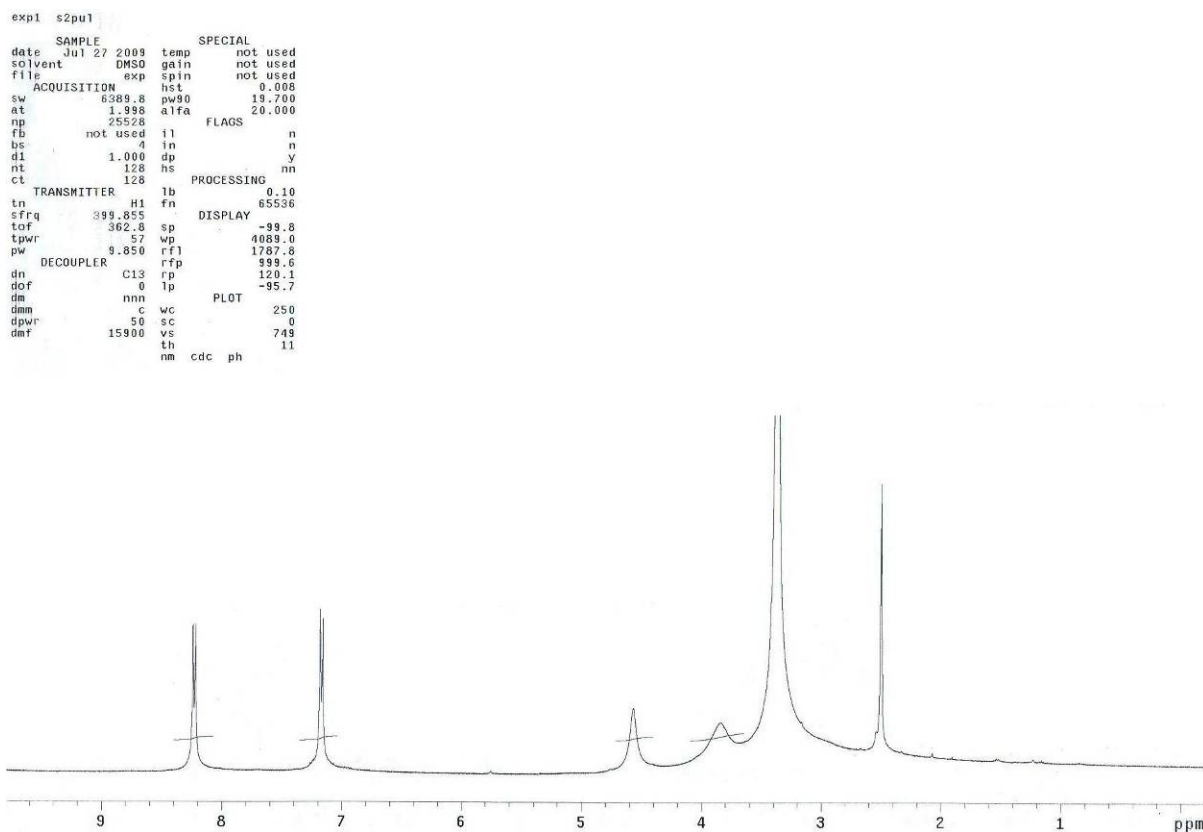

Figure S11. <sup>1</sup>H-NMR spectrum (400 MHz, DMSO-*d*<sub>6</sub>) of [HL<sup>+</sup>][Br<sup>-</sup>] (2) in DMSO-*d*<sub>6</sub>.

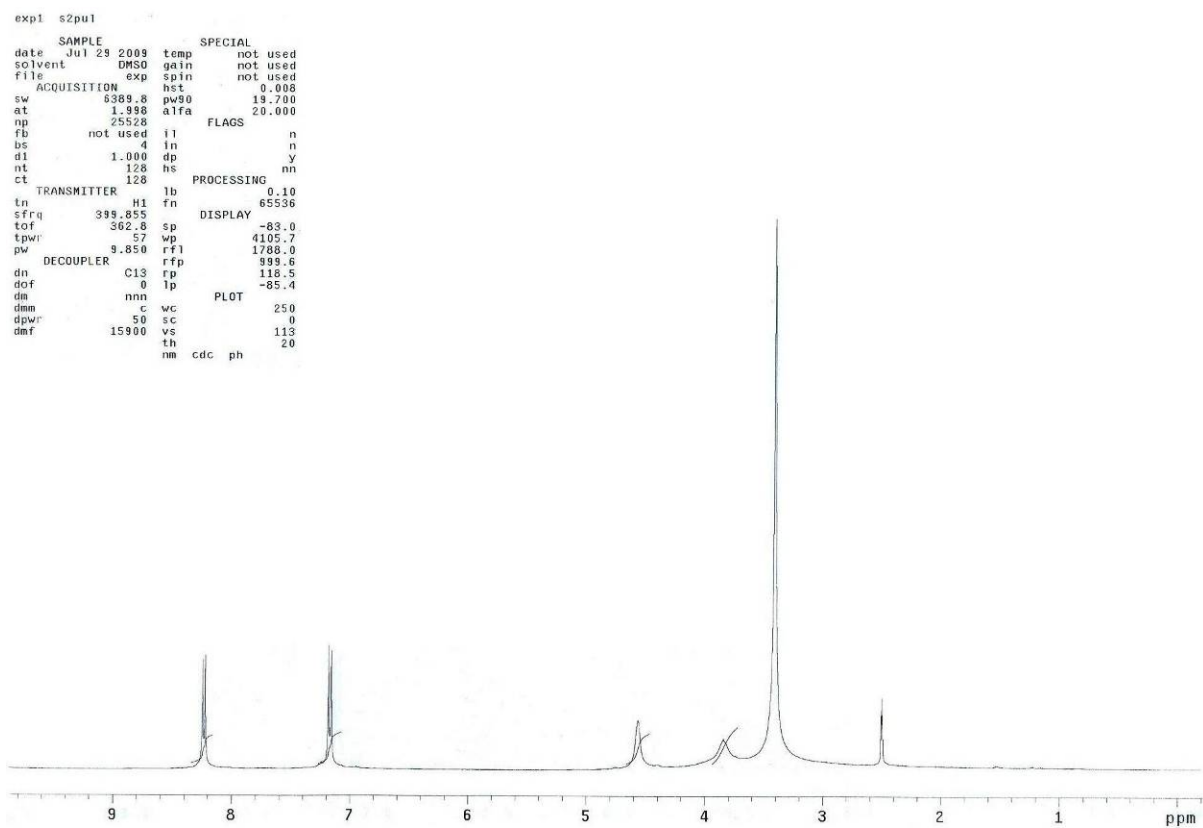

Figure S12. <sup>1</sup>H-NMR spectrum (400 MHz, DMSO-*d*<sub>6</sub>) of [HL<sup>+</sup>][NO<sub>3</sub><sup>-</sup>] (3) in DMSO-*d*<sub>6</sub>.

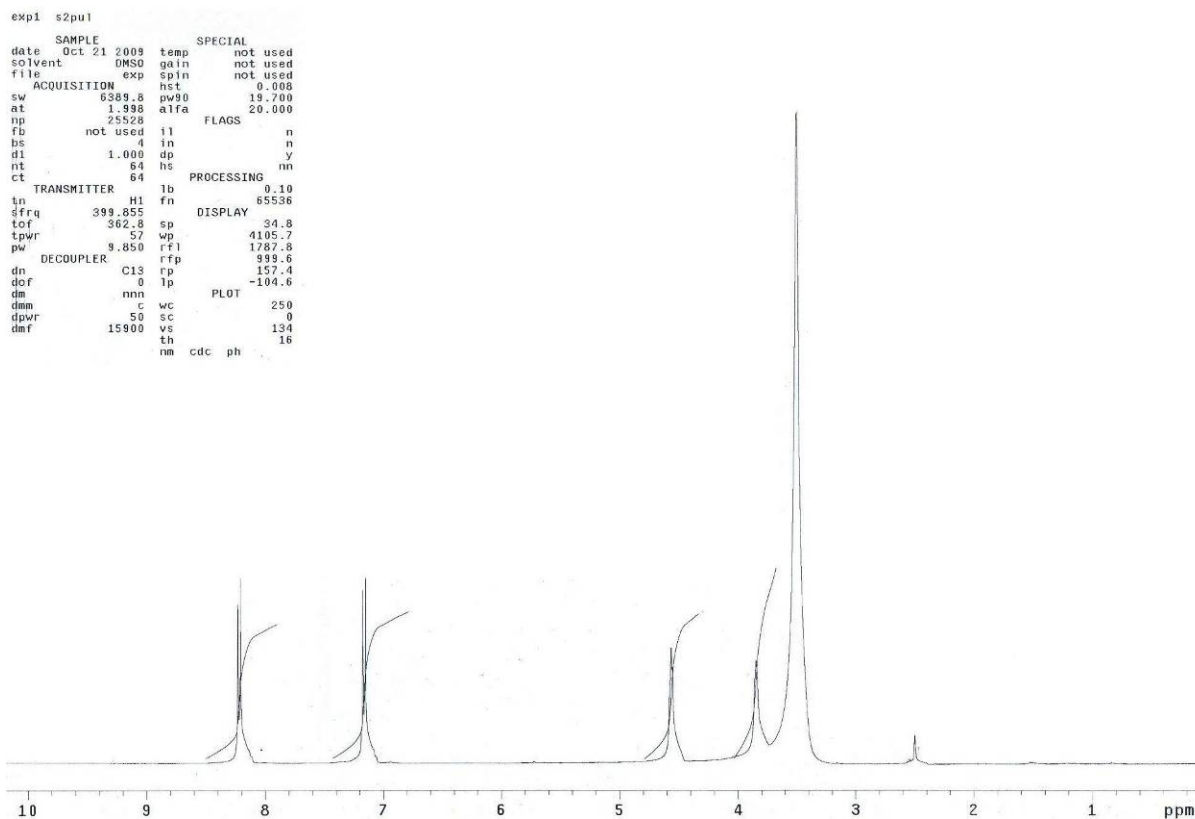

Figure S13.  $^1\text{H-NMR}$  spectrum (400 MHz,  $\text{DMSO-}d_6$ ) of  $[\text{HL}^+][\text{ClO}_4^-]$  (**4**) in  $\text{DMSO-}d_6$ .

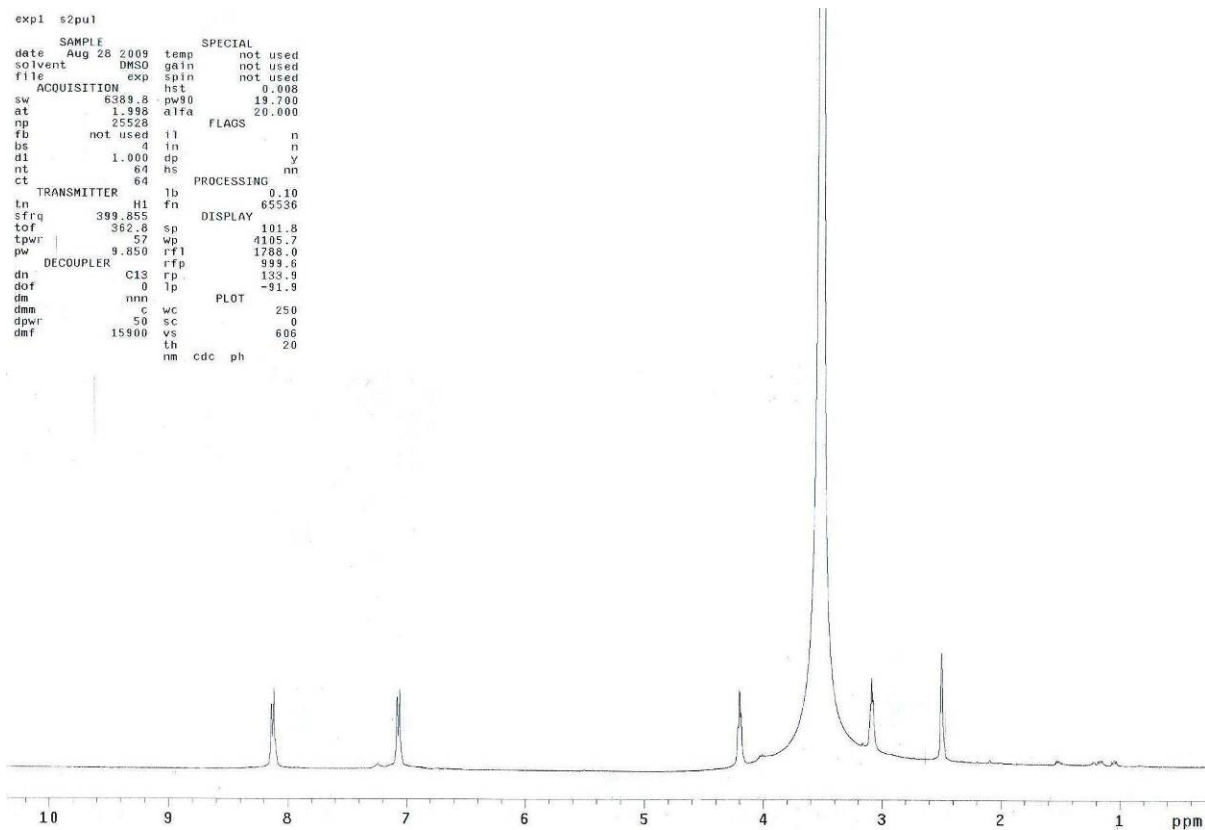

Figure S14.  $^1\text{H-NMR}$  spectrum (400 MHz,  $\text{DMSO-}d_6$ ) of  $[\text{HL}^+][\text{CF}_3\text{COO}^-]$  (**5**) in  $\text{DMSO-}d_6$ .



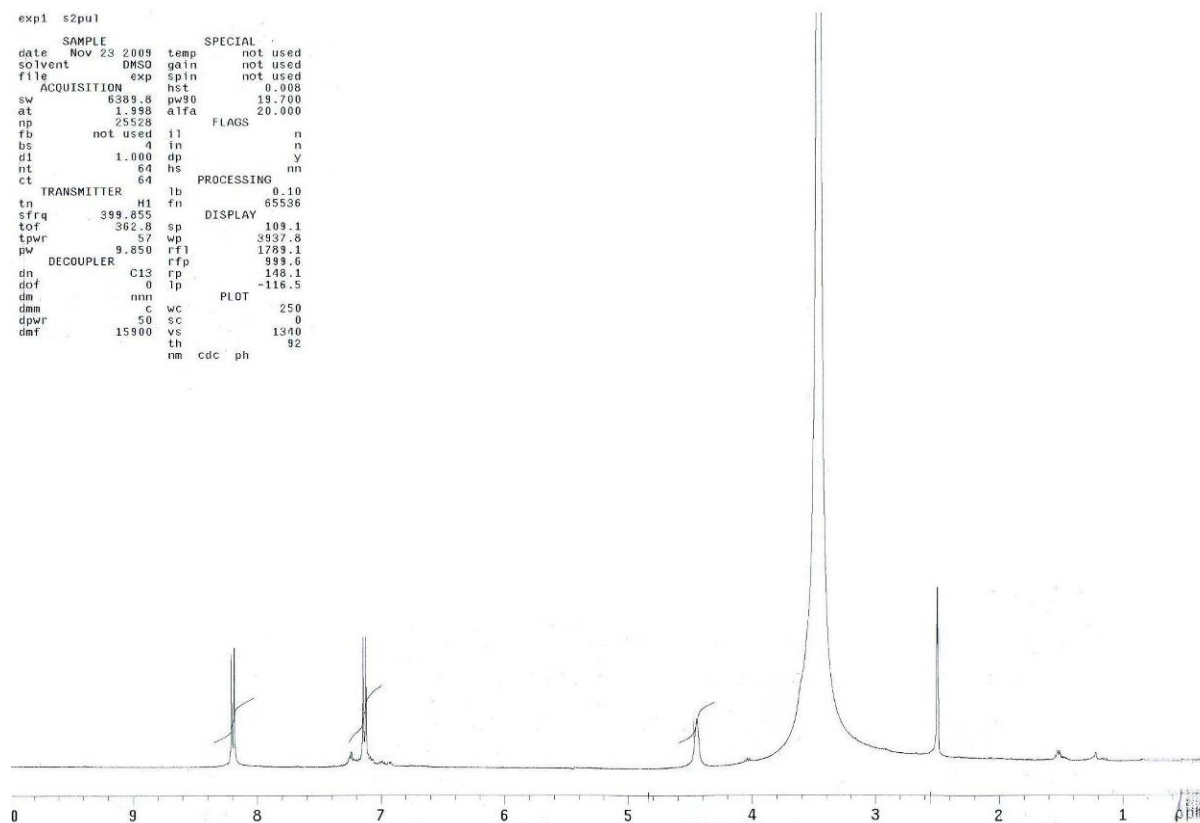

Figure S15.  $^1\text{H}$ -NMR spectrum (400 MHz,  $\text{DMSO-}d_6$ ) of  $[\text{HL}^+][\text{SiF}_6^-]$  (**6**) in  $\text{DMSO-}d_6$ .

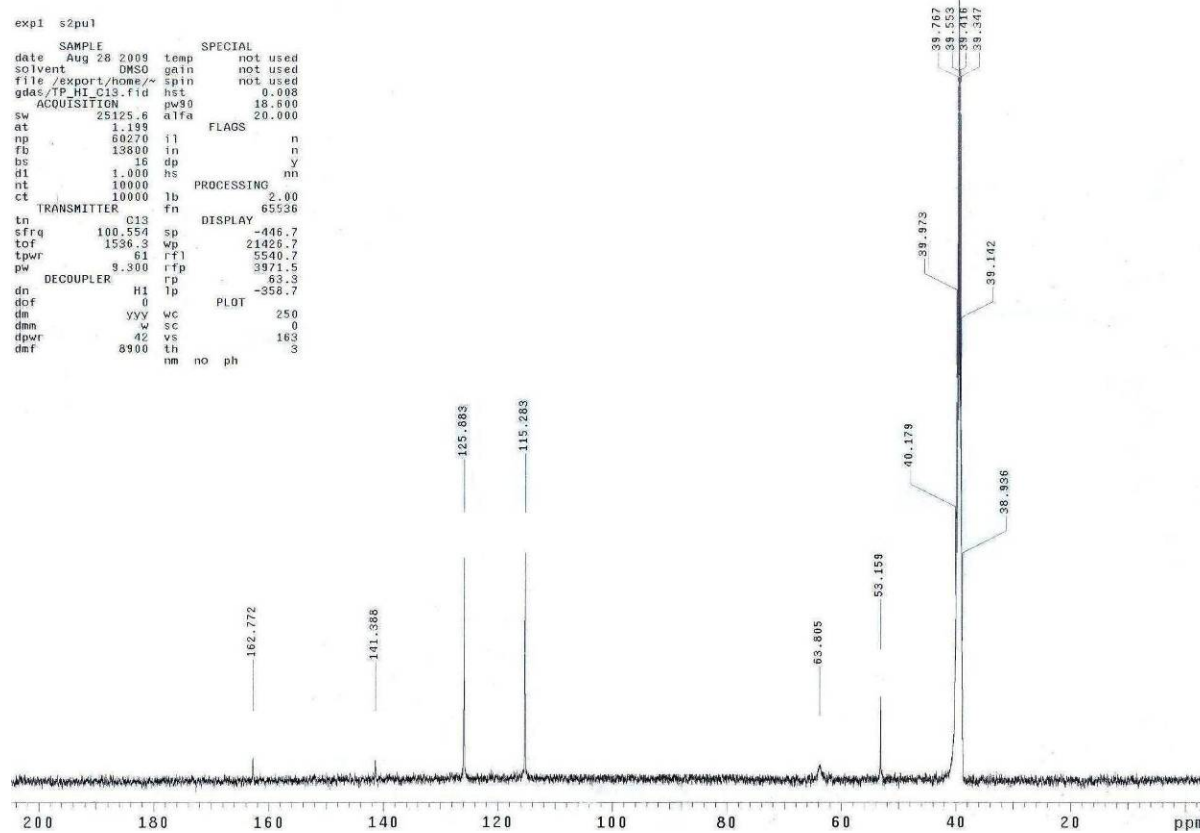

Figure S16.  $^{13}\text{C}$ -NMR spectrum (100 MHz,  $\text{DMSO-}d_6$ ) of  $[\text{HL}^+][\text{Cl}^-]$  (**1**) in  $\text{DMSO-}d_6$ .

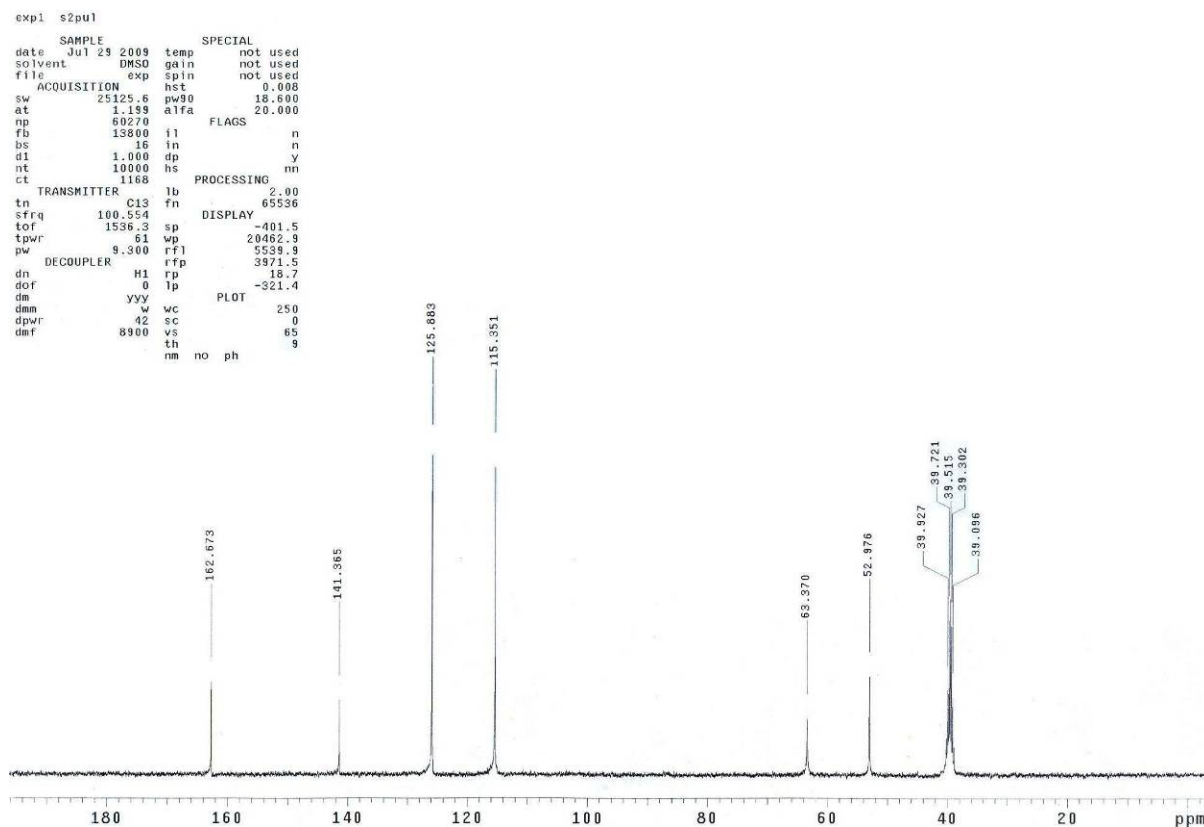

Figure S17.  $^{13}\text{C}$ -NMR spectrum (100 MHz,  $\text{DMSO-}d_6$ ) of  $[\text{HL}^+][\text{Br}^-]$  (2) in  $\text{DMSO-}d_6$ .

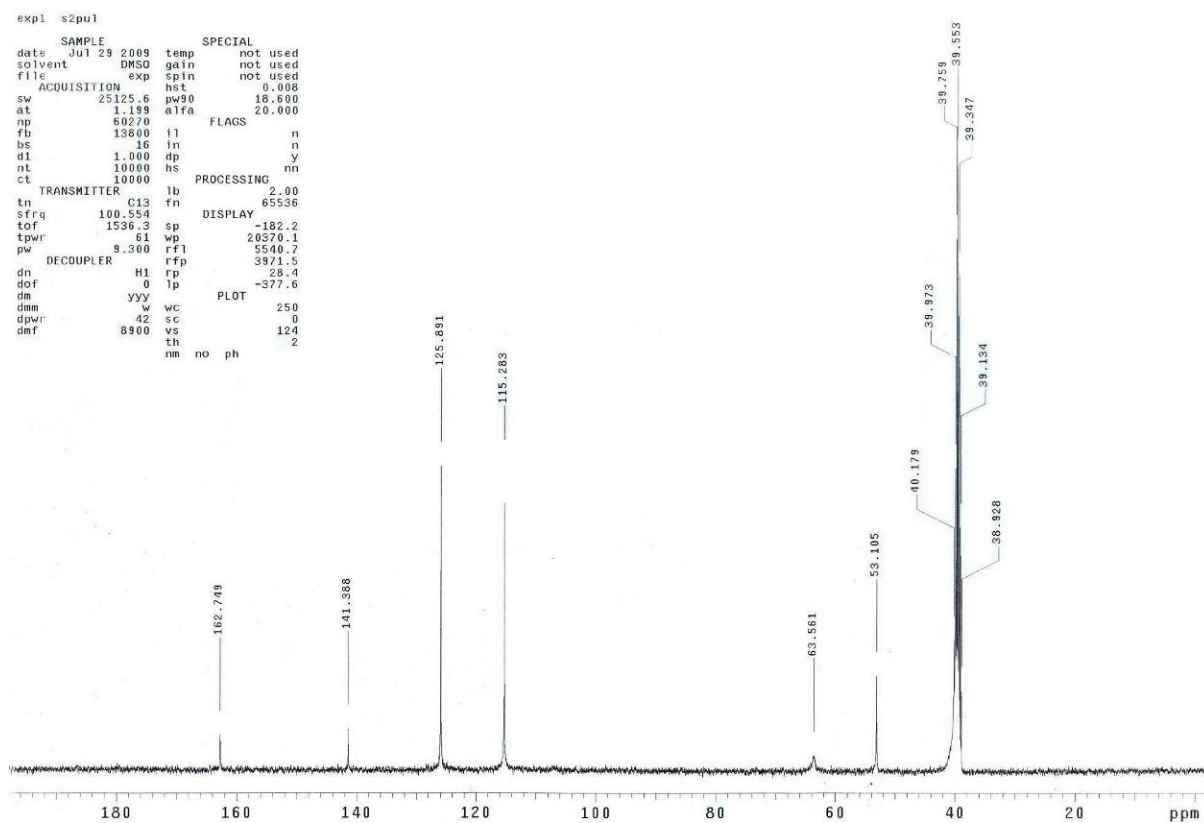

Figure S18.  $^{13}\text{C}$ -NMR spectrum (100 MHz,  $\text{DMSO-}d_6$ ) of  $[\text{HL}^+][\text{NO}_3^-]$  (3) in  $\text{DMSO-}d_6$ .

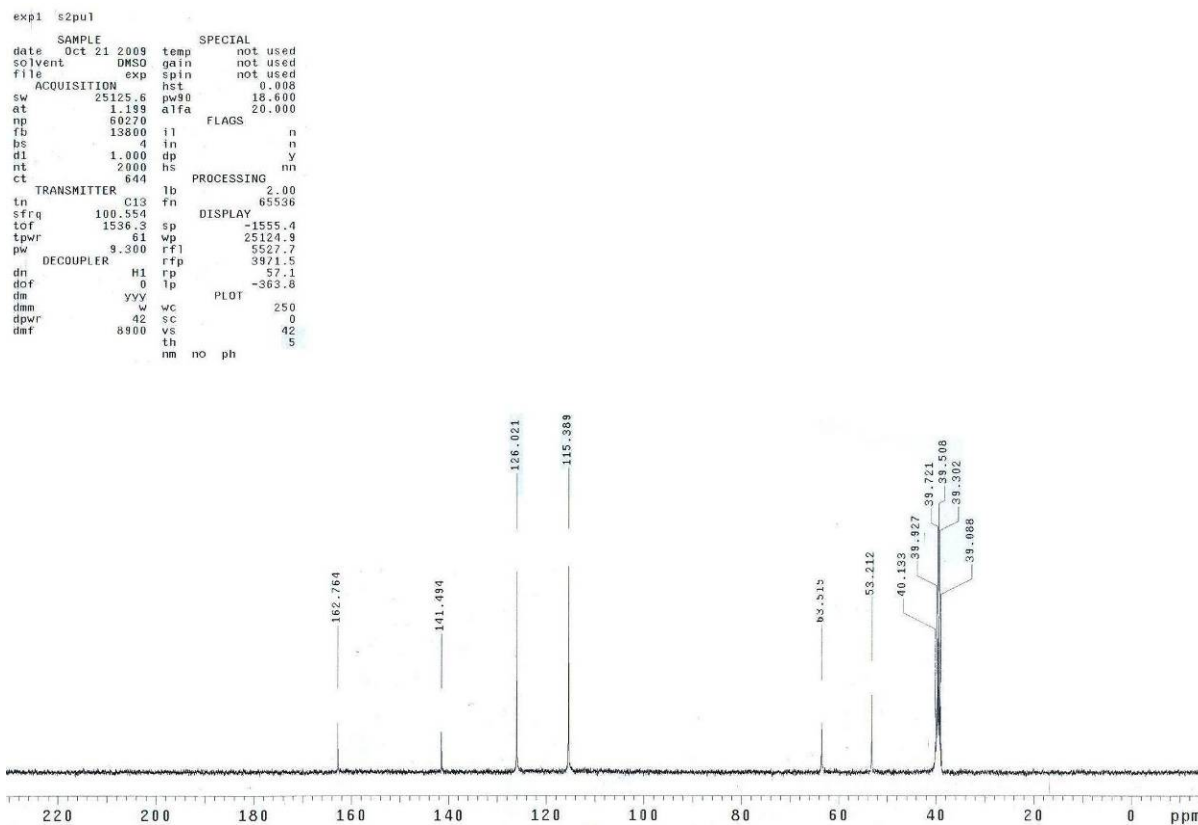

Figure S19.  $^{13}\text{C}$ -NMR spectrum (100 MHz,  $\text{DMSO-}d_6$ ) of  $[\text{HL}^+][\text{ClO}_4^-]$  (**4**) in  $\text{DMSO-}d_6$ .

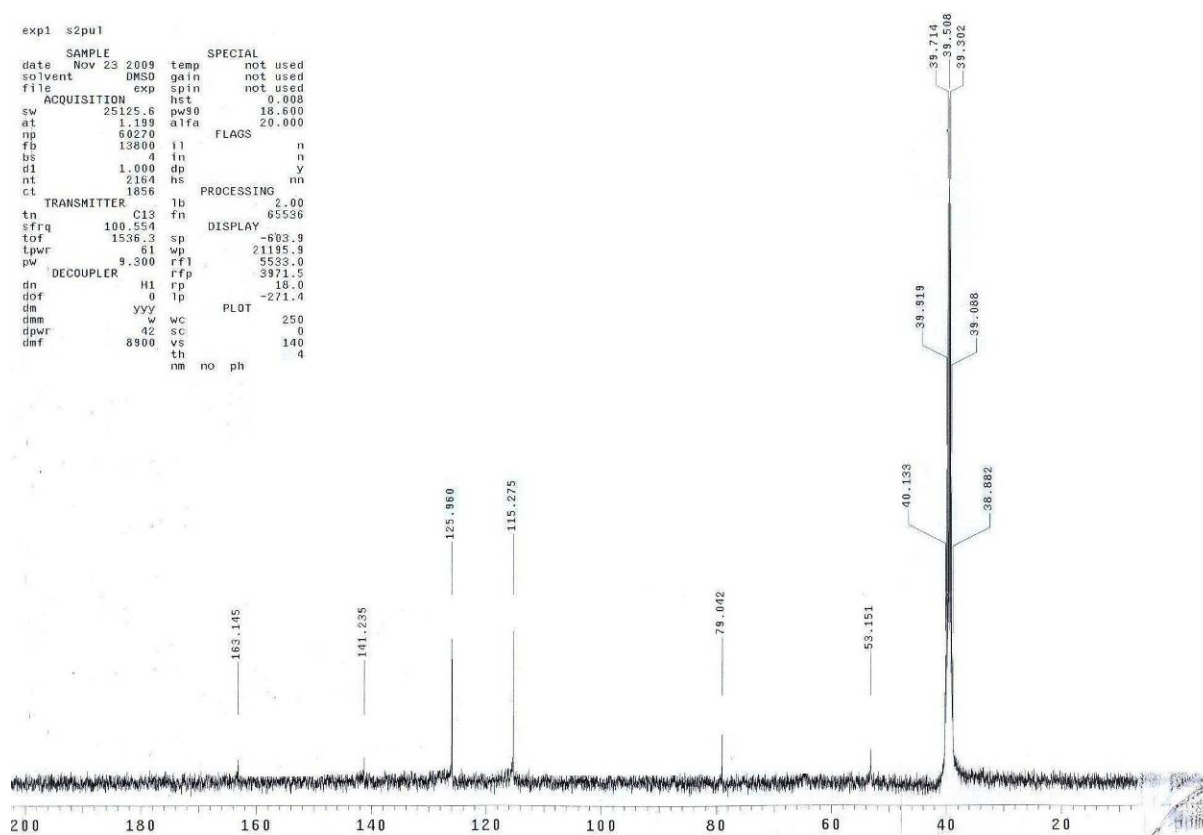

Figure S20.  $^{13}\text{C}$ -NMR spectrum (100 MHz,  $\text{DMSO-}d_6$ ) of  $[\text{HL}^+][\text{CF}_3\text{COO}^-]$  (**5**) in  $\text{DMSO-}d_6$ .

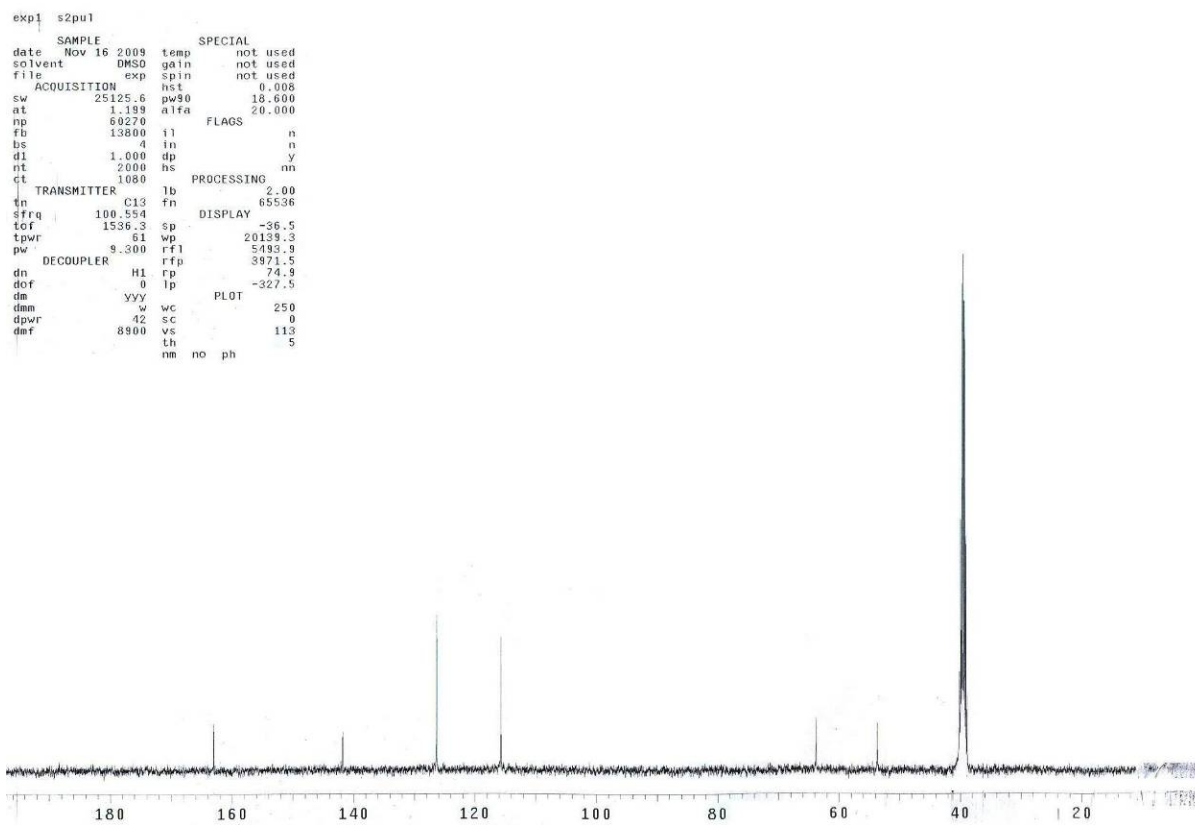

Figure S21.  $^{13}\text{C}$ -NMR spectrum (100 MHz,  $\text{DMSO-}d_6$ ) of  $[\text{HL}^+][\text{SiF}_6^-]$  (**6**) in  $\text{DMSO-}d_6$ .

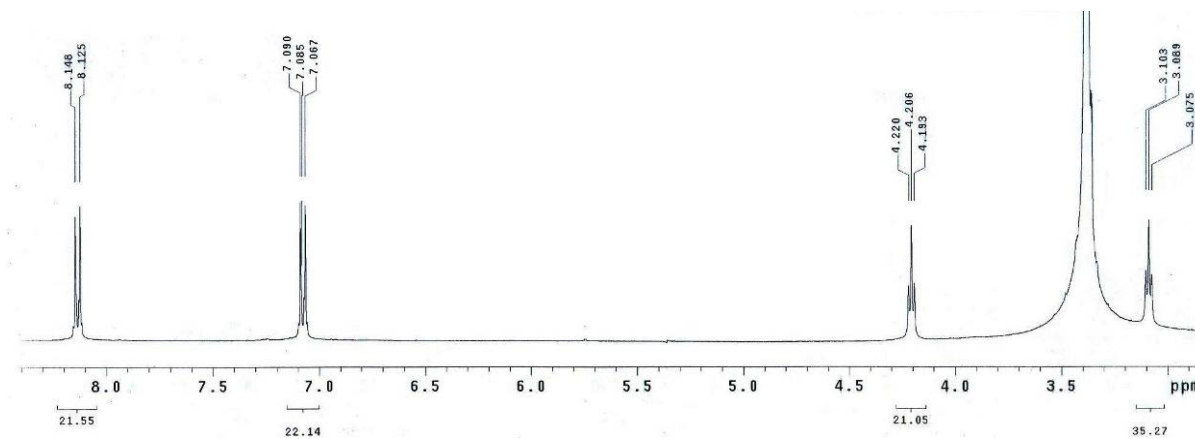

Figure S22. Selected region of the  $^1\text{H}$ -NMR (400 MHz,  $\text{DMSO-}d_6$ ) spectrum of receptor **L**.

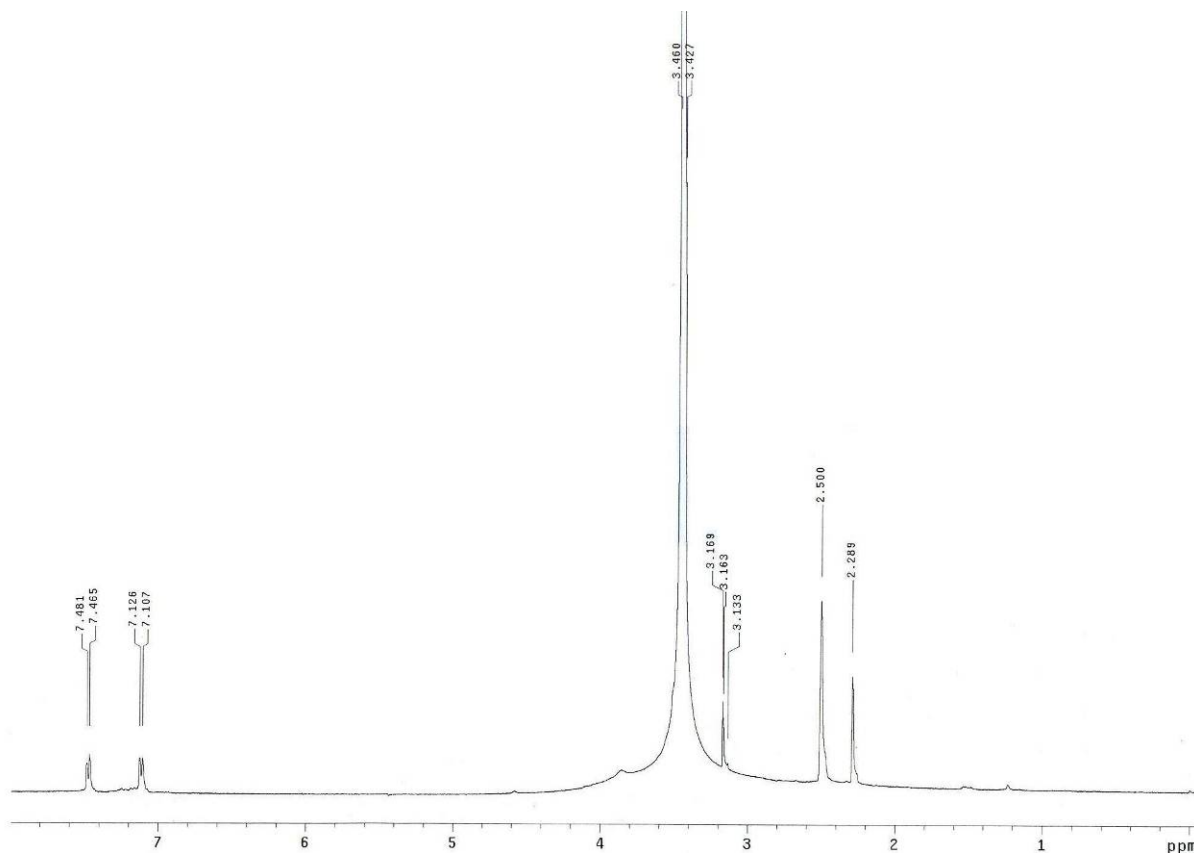

**Figure S23.** <sup>1</sup>H-NMR (400 MHz, DMSO-*d*<sub>6</sub>) spectrum of receptor **L** with 1 equivalent of *p*-toluene sulphonic acid (PTSA), [HL<sup>+</sup>]<sup>+</sup>[OTs]<sup>-</sup> salt.

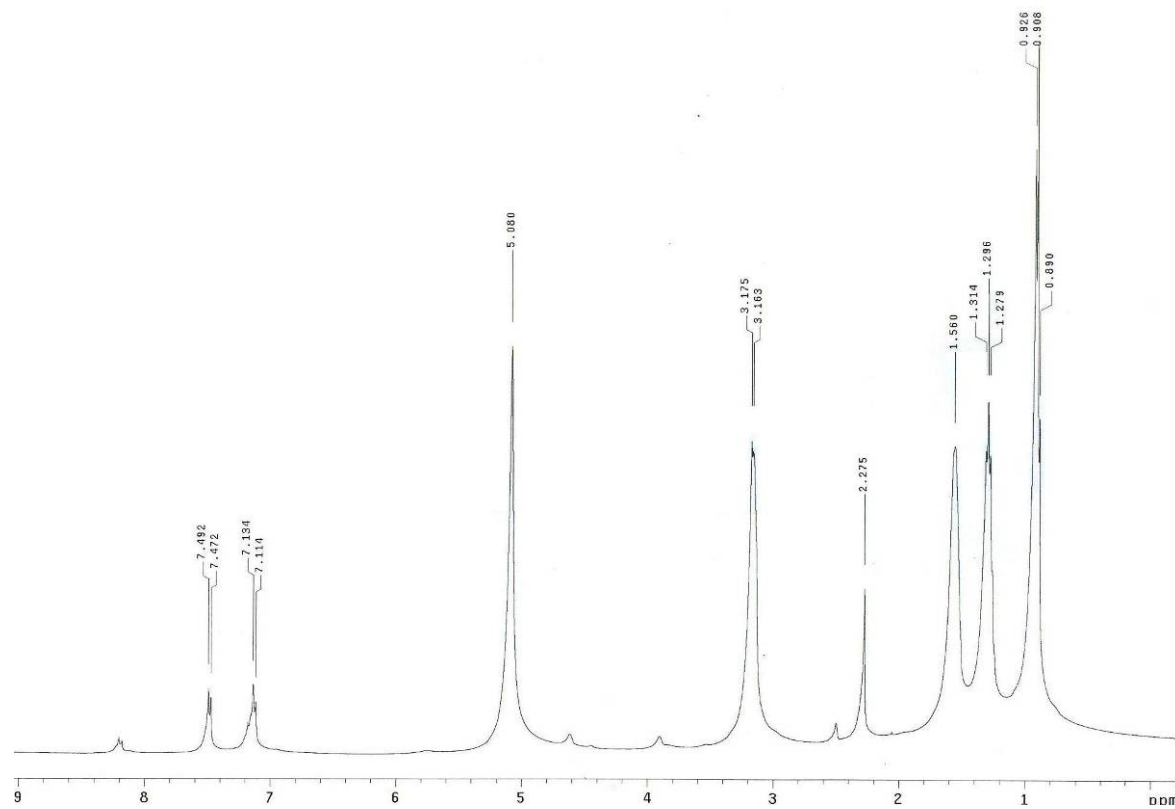

**Figure S24.** <sup>1</sup>H-NMR (400 MHz, DMSO-*d*<sub>6</sub>) spectrum of [HL<sup>+</sup>]<sup>+</sup>[OTs]<sup>-</sup> salt, doped with 1.2 equivalent of tetrabutyl ammonium bromide.

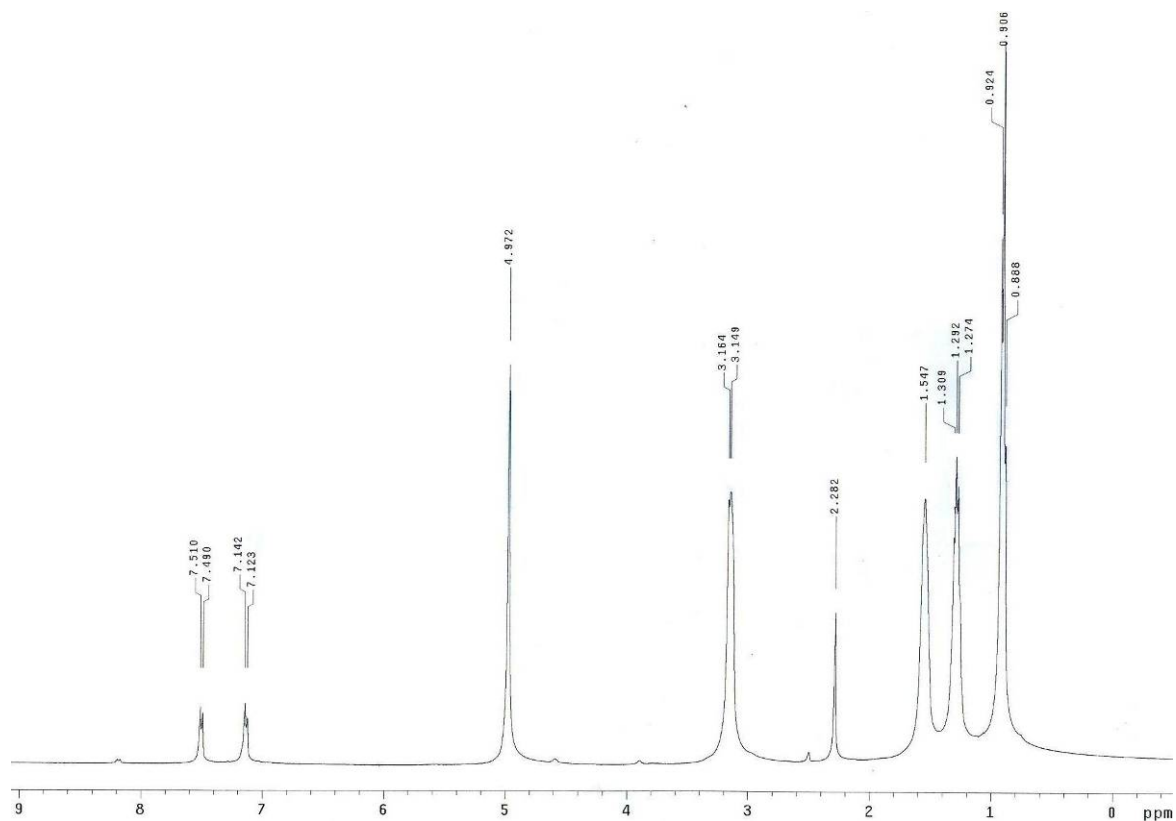

**Figure S25.**  $^1\text{H-NMR}$  (400 MHz,  $\text{DMSO-}d_6$ ) spectrum of  $[\text{HL}^+][\text{OTs}]$  salt, doped with 1.2 equivalent of tetrabutyl ammonium nitrate.

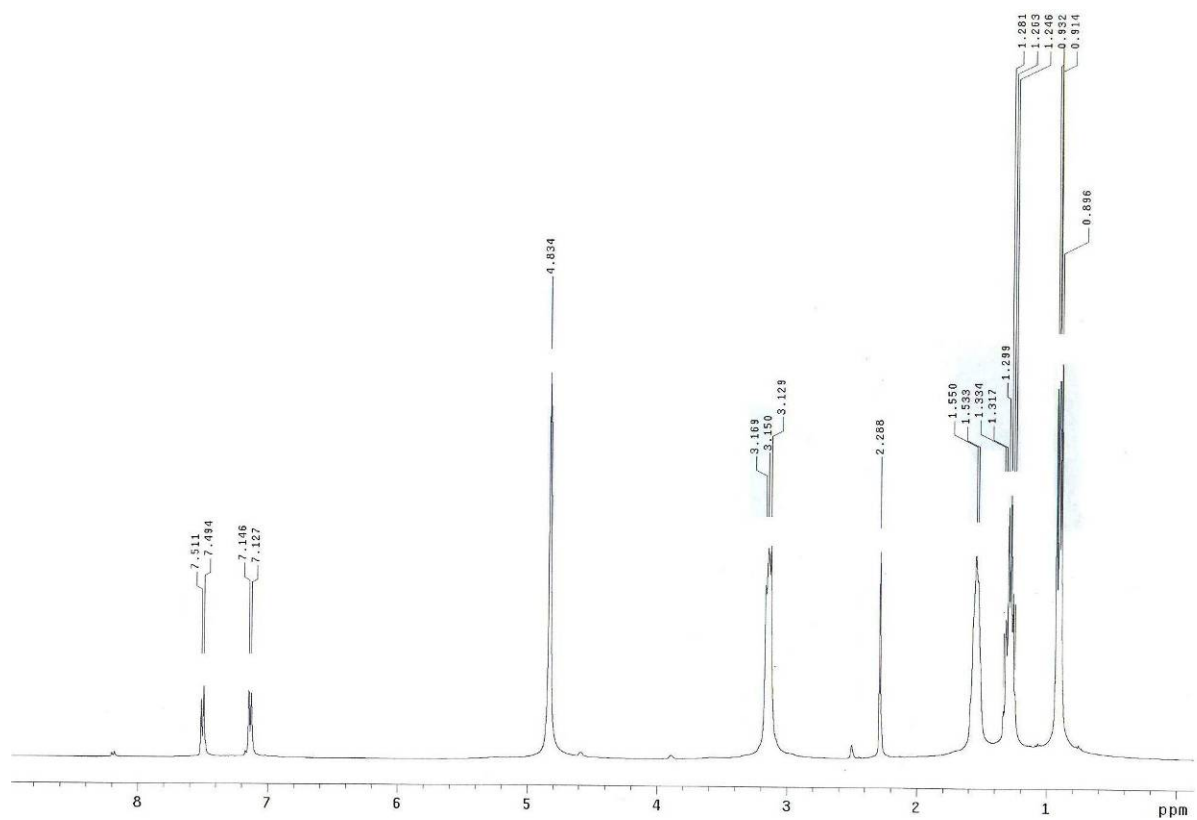

**Figure S26.**  $^1\text{H-NMR}$  (400 MHz,  $\text{DMSO-}d_6$ ) spectrum of  $[\text{HL}^+][\text{OTs}]$  salt, doped with 1.2 equivalent of tetrabutyl ammonium perchlorate.

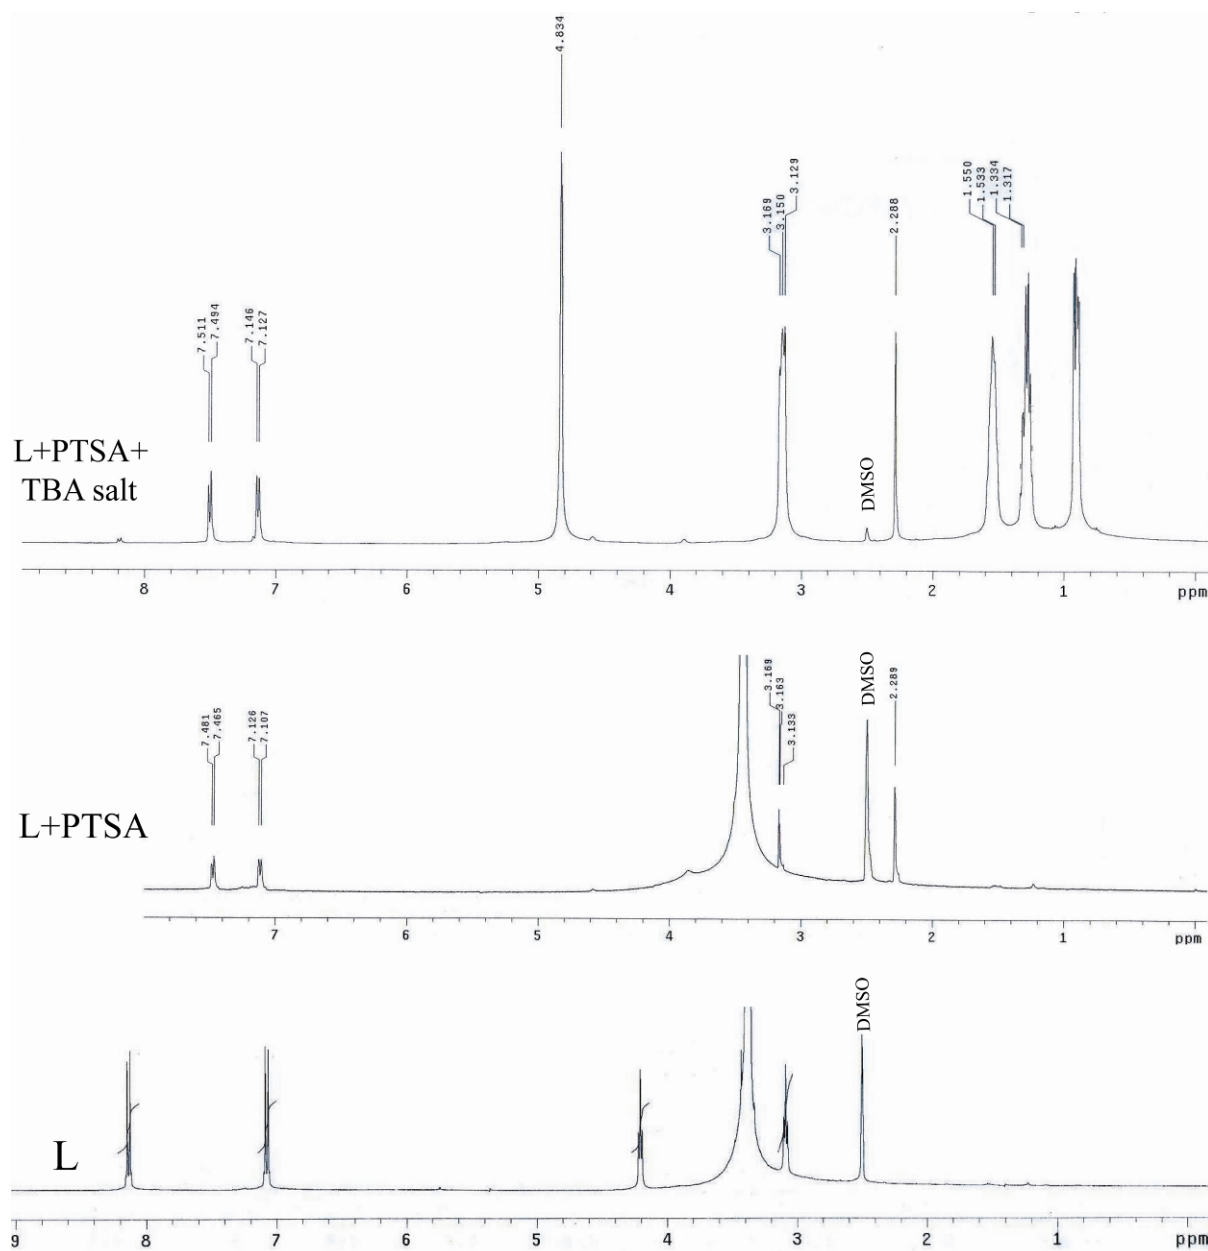

**Figure S27.** <sup>1</sup>H-NMR (400 MHz, DMSO-*d*<sub>6</sub>) spectra of receptor **L** (below), **L** with 1 equivalent of *p*-toluene sulphonic acid (PTSA), [HL<sup>+</sup>][OTs] salt (middle) and [HL<sup>+</sup>][OTs] with 1.2 equivalent of tetrabutyl ammonium (TBA) salt of inorganic anions (above).

**Table S1.** Selected interligand non-covalent interactions among LH<sup>+</sup> units in anionic complexes 1-6.

| D-H...A                                                                    | <i>d</i> (H...A) (Å) | <i>d</i> (D...A) (Å) | ∠(DHA) (°) |
|----------------------------------------------------------------------------|----------------------|----------------------|------------|
| [HL <sup>+</sup> ][Cl <sup>-</sup> ] (1)                                   |                      |                      |            |
| C16-H16...O2                                                               | 2.51                 | 3.390                | 156        |
| C2-H2B...O3                                                                | 2.60                 | 3.229                | 121        |
| C10-H10A...O3                                                              | 2.59                 | 3.560                | 178        |
| C8-H8...O3                                                                 | 2.33                 | 3.222                | 160        |
| C17-H17B...O5                                                              | 2.70                 | 3.349                | 124        |
| C20-H20...O6                                                               | 2.52                 | 3.428                | 164        |
| C7-H7...C2g                                                                | 3.037                | 3.970                | 157        |
| C1g...C1g                                                                  |                      | 4.183                |            |
| C3g...C3g                                                                  |                      | 3.610                |            |
| C1g...C3g                                                                  |                      | 3.858                |            |
| [HL <sup>+</sup> ][Br <sup>-</sup> ] (2)                                   |                      |                      |            |
| C24-H24...O3                                                               | 2.63                 | 3.499                | 162        |
| C2-H2A...O5                                                                | 2.55                 | 3.559                | 172        |
| C10-H10A...O5                                                              | 2.59                 | 3.263                | 125        |
| C16-H16...O5                                                               | 2.42                 | 3.328                | 163        |
| C8-H8...O6                                                                 | 2.52                 | 3.415                | 160        |
| C23-H23...O9                                                               | 2.70                 | 3.504                | 150        |
| C3g...C3g                                                                  |                      | 3.601                |            |
| C3g...C2g                                                                  |                      | 3.906                |            |
| C15-H15...C1g                                                              | 3.056                | 3.924                | 156        |
| [HL <sup>+</sup> ][NO <sub>3</sub> <sup>-</sup> ] (3)                      |                      |                      |            |
| C1-H1B...O3                                                                | 2.70                 | 3.594                | 152        |
| C24-H24...O3                                                               | 2.60                 | 3.323                | 134        |
| C2-H2A...O5                                                                | 2.60                 | 3.472                | 148        |
| C17-H17B...O5                                                              | 2.67                 | 3.644                | 175        |
| C4-H4...O6                                                                 | 2.48                 | 3.399                | 168        |
| C10-H10A...O6                                                              | 2.58                 | 3.256                | 126        |
| C8-H8...O9                                                                 | 2.40                 | 3.089                | 130        |
| [HL <sup>+</sup> ][ClO <sub>4</sub> <sup>-</sup> ] (4)                     |                      |                      |            |
| C17-H17A...O2                                                              | 2.54                 | 3.367                | 142        |
| C10-H10B...O3                                                              | 2.71                 | 3.594                | 151        |
| C17-H17B...O3                                                              | 2.33                 | 3.235                | 154        |
| C9-H9B...O5                                                                | 2.51                 | 3.373                | 147        |
| C24-H24...O6                                                               | 2.54                 | 3.431                |            |
| C8-H8...O8                                                                 | 2.68                 | 3.563                | 157        |
| [HL <sup>+</sup> ][CF <sub>3</sub> COO <sup>-</sup> ] (5)                  |                      |                      |            |
| C9-H9A...O2                                                                | 2.56                 | 3.324                | 135        |
| C10-H10A...O3                                                              | 2.67                 | 3.620                | 164        |
| C17-H17B...O5                                                              | 2.68                 | 3.615                | 160        |
| C17-H17B...O6                                                              | 2.66                 | 3.497                | 143        |
| C20-H20...O6                                                               | 2.56                 | 3.155                | 121        |
| C1g...C1g                                                                  |                      | 3.726                |            |
| C2g...C2g                                                                  |                      | 3.518                |            |
| [2HL <sup>+</sup> ][SiF <sub>6</sub> <sup>2-</sup> ].2H <sub>2</sub> O (6) |                      |                      |            |
| C9-H9B...O3                                                                | 2.55                 | 3.372                | 149        |
| C33-H33A...O3                                                              | 2.60                 | 3.364                | 135        |
| C50-H50A...O5                                                              | 2.66                 | 3.592                | 159        |
| C1-H1B...O6                                                                | 2.57                 | 3.290                | 131        |
| C53-H53...O9                                                               | 2.67                 | 3.413                | 136        |
| C55-H55...O11                                                              | 2.60                 | 3.521                | 169        |
| C50-H50B...O12                                                             | 2.60                 | 3.348                | 133        |
| C1-H1A...O15                                                               | 2.61                 | 3.371                | 135        |
| C65-H65A...O15                                                             | 2.58                 | 3.487                | 154        |
| C16-H16...O17                                                              | 2.56                 | 3.381                | 146        |
| C25-H25B...O20                                                             | 2.46                 | 3.339                | 149        |



|                 |      |       |     |
|-----------------|------|-------|-----|
| C49-H49B····O20 | 2.69 | 3.405 | 130 |
| C68-H68····O21  | 2.51 | 3.380 | 155 |
| C34-H34A····O24 | 2.65 | 3.605 | 166 |
| C69-H69····O27  | 2.71 | 3.546 | 149 |
| C1g····C1g      |      | 3.688 |     |
| C1g····C5g      |      | 3.544 |     |
| C5g····C7g      |      | 3.671 |     |
| C7g····C7g      |      | 3.507 |     |
| C4g····C4g      |      | 3.629 |     |

C1g = Centroid of ring C3-C8  
C2g = Centroid of ring C11-C16  
C3g = Centroid of ring C19-C24

\*C4g = Centroid of ring C27-C32  
\*C5g = Centroid of ring C35-C40  
\*C7g = Centroid of ring C51-C56  
\* = Present only in complex 6

**Table S2.** Molecular conformation: Relevant Torsion Angles in anion complexes **1-6** ( $\tau_{\text{ether}}$  = atoms involving  $\text{N}_{\text{amino}}\text{-C-C-O}_{\text{ether}}$  and  $\tau_{\text{amino}}$  = atoms involving  $\text{C-N}_{\text{amino}}\text{-C-C}$ ).

| Complexes                 | 1       | 2       | 3      | 4      | 5      | 6       |
|---------------------------|---------|---------|--------|--------|--------|---------|
| (a) $\tau_{\text{ether}}$ |         |         |        |        |        |         |
| N1-C1-C2-O1               | -161.67 | 60.29   | -70.56 | -55.88 | -83.38 | 72.40   |
| N1-C9-C10-O4              | -58.78  | 160.80  | 56.50  | 168.30 | 80.23  | -77.81  |
| N1-C17-C18-O7             | -79.42  | 79.01   | 90.27  | -65.60 | -74.81 | 166.97  |
| (b) $\tau_{\text{amino}}$ |         |         |        |        |        |         |
| C1-N1-C9-C10              | -54.64  | 58.73   | 48.06  | 56.86  | 65.14  | 56.19   |
| C1-N1-C17-C18             | 50.78   | 179.95  | -59.10 | 157.30 | 174.07 | -178.68 |
| C9-N1-C1-C2               | -57.98  | 52.65   | 63.95  | 174.10 | 52.08  | 54.66   |
| C9-N1-C17-C18             | 178.33  | -50.86  | 169.58 | -75.56 | -57.34 | 50.36   |
| C17-N1-C1-C2              | 67.36   | -177.41 | -62.41 | -57.43 | 178.66 | -74.07  |
| C17-N1-C9-C10             | 177.07  | -67.64  | 177.70 | -72.54 | -60.42 | -175.05 |
